# Supplementary material for: Prevalence, Incidence and Associates of Pulmonary Hypertension Complicating Type 2 Diabetes: Insights from the Fremantle Diabetes Study Phase 2 and National Echocardiographic Database of Australia
Source: MDPI journal article supplement (doi:10.3390/jcm10194503), 2021-09-29
Supplement: s1 [file s1]

**Table S1.** Baseline characteristics of type 2 diabetes participants by i) NEDA status, and ii) measured/measurable RVSP status. Data are percentages, mean  $\pm$  SD, geometric mean (SD range) or median [inter-quartile range].

|                                                         | All             | Not in NEDA     | In NEDA         | <i>P</i> -value | No measured/<br>measurable RVSP | Measured RVSP   | <i>P</i> -value |
|---------------------------------------------------------|-----------------|-----------------|-----------------|-----------------|---------------------------------|-----------------|-----------------|
| Number (%)                                              | 1430 (100)      | 827 (57.8)      | 603 (42.2)      |                 | 242 (40.1)                      | 361 (59.9)      |                 |
| Age (years)                                             | 65.5 $\pm$ 11.6 | 64.0 $\pm$ 11.7 | 67.5 $\pm$ 11.0 | <0.001          | 64.1 $\pm$ 11.1                 | 69.9 $\pm$ 10.4 | <0.001          |
| Sex (% male)                                            | 51.5            | 51.0            | 52.2            | 0.668           | 60.7                            | 46.5            | 0.001           |
| APOE4 genotype (%)                                      | 23.5            | 24.9            | 21.7            | 0.183           | 21.5                            | 21.8            | >0.999          |
| Ethnic background (%):                                  |                 |                 |                 | 0.059           |                                 |                 | 0.147           |
| Anglo-Celt                                              | 52.4            | 50.3            | 55.4            |                 | 54.5                            | 56.0            |                 |
| Southern European                                       | 12.9            | 13.3            | 12.4            |                 | 11.6                            | 13.0            |                 |
| Other European                                          | 7.1             | 6.8             | 7.6             |                 | 10.7                            | 5.5             |                 |
| Asian                                                   | 4.3             | 4.8             | 3.6             |                 | 2.1                             | 4.7             |                 |
| Aboriginal                                              | 7.5             | 6.9             | 8.3             |                 | 12.4                            | 12.7            |                 |
| Mixed/other                                             | 15.7            | 17.9            | 12.6            |                 | 8.7                             | 8.0             |                 |
| Not fluent in English (%)                               | 10.8            | 10.8            | 10.9            | 0.931           | 10.3                            | 11.4            | 0.790           |
| Currently married/ <i>de facto</i> relationship (%)     | 62.6            | 66.0            | 57.9            | 0.002           | 60.3                            | 56.2            | 0.355           |
| Educated beyond primary level (%)                       | 86.6            | 87.2            | 85.7            | 0.426           | 83.8                            | 87.1            | 0.278           |
| Smoking status (%)                                      |                 |                 |                 | 0.272           |                                 |                 | 0.038           |
| Never                                                   | 42.4            | 43.8            | 40.4            |                 | 34.7                            | 44.2            |                 |
| Ex-                                                     | 46.7            | 46.2            | 47.4            |                 | 50.2                            | 45.6            |                 |
| Current                                                 | 10.9            | 10.0            | 12.2            |                 | 15.1                            | 10.3            |                 |
| TV viewing >21 hours/week (%)                           | 34.2            | 34.2            | 34.2            | >0.999          | 34.2                            | 34.1            | >0.999          |
| Alcohol consumption (standard drinks/day)               | 0.1 [0-1.2]     | 0.1 [0-1.2]     | 0.1 [0-1.2]     | 0.459           | 0.3 [0-1.2]                     | 0.1 [0-1.2]     | 0.058           |
| Age at diabetes diagnosis (years)                       | 55.6 $\pm$ 12.2 | 55.5 $\pm$ 12.0 | 55.8 $\pm$ 12.6 | 0.600           | 52.7 $\pm$ 12.7                 | 57.9 $\pm$ 12.6 | <0.001          |
| Diabetes duration (years)                               | 8.0 [2.5-15.4]  | 6.0 [2.0-13.8]  | 11.0 [3.7-17.3] | <0.001          | 10.0 [3.0-17.2]                 | 11.9 [4.0-17.8] | 0.308           |
| Diabetes treatment (%)                                  |                 |                 |                 | 0.001           |                                 |                 | 0.003           |
| Diet                                                    | 24.9            | 26.9            | 22.2            |                 | 20.2                            | 23.5            |                 |
| Oral hypoglycemic agents (OHAs)/non-insulin injectables | 54.0            | 55.2            | 52.4            |                 | 46.7                            | 56.2            |                 |
| Insulin only (%)                                        | 5.4             | 3.8             | 7.6             |                 | 8.7                             | 6.9             |                 |

|                                              |               |               |               |        |               |               |        |
|----------------------------------------------|---------------|---------------|---------------|--------|---------------|---------------|--------|
| Insulin+OHAs/non-unsulin injectables         | 15.7          | 14.2          | 17.7          |        | 24.4          | 13.3          |        |
| Fasting serum glucose (mmol/L)               | 7.1 [6.1-8.8] | 7.2 [6.2-8.7] | 7.0 [6.0-8.9] | 0.190  | 7.4 [6.1-9.1] | 6.9 [5.9-8.7] | 0.050  |
| HbA <sub>1c</sub> (%)                        | 6.8 [6.2-7.7] | 6.8 [6.2-7.7] | 6.8 [6.2-7.7] | 0.832  | 7.0 [6.3-8.0] | 6.7 [6.2-7.4] | 0.002  |
| HbA <sub>1c</sub> (mmol/mol)                 | 51 [44-61]    | 51 [44-61]    | 51 [44-61]    | 0.832  | 53 [45-64]    | 50 [44-57]    | 0.002  |
| ABSI (m <sup>11/6</sup> /kg <sup>2/3</sup> ) | 0.081±0.005   | 0.081±0.005   | 0.082±0.005   | <0.001 | 0.082±0.005   | 0.082±0.006   | 0.819  |
| BMI (kg/m <sup>2</sup> )                     | 31.3±6.1      | 30.9±5.7      | 31.8±6.4      | 0.007  | 33.2±6.6      | 30.8±6.1      | <0.001 |
| Central obesity (by waist circumference; %)  | 71.3          | 69.1          | 74.2          | 0.043  | 77.6          | 71.9          | 0.128  |
| Heart rate (bpm)                             | 70±12         | 70±12         | 70±13         | 0.472  | 70±12         | 71±14         | 0.389  |
| Supine systolic blood pressure (mmHg)        | 146±22        | 144±21        | 148±23        | 0.002  | 148±22        | 148±23        | 0.895  |
| Supine diastolic blood pressure (mmHg)       | 80±12         | 80±11         | 80±13         | 0.401  | 81±14         | 79±13         | 0.020  |
| Pulse pressure (mm Hg)                       | 65±18         | 64±17         | 68±19         | <0.001 | 66±17         | 69±20         | 0.068  |
| Orthostatic hypotension (%)                  | 31.8          | 27.9          | 37.2          | <0.001 | 36.0          | 38.0          | 0.664  |
| Antihypertensive medication (%)              | 74.0          | 68.3          | 81.7          | <0.001 | 79.7          | 83.1          | 0.333  |
| Total serum cholesterol (mmol/L)             | 4.4±1.1       | 4.4±1.1       | 4.2±1.1       | 0.003  | 4.3±1.1       | 4.2±1.1       | 0.658  |
| Serum HDL-cholesterol (mmol/L)               | 1.23±0.34     | 1.22±0.32     | 1.25±0.36     | 0.137  | 1.21±0.30     | 1.27±0.39     | 0.051  |
| Serum triglycerides (mmol/L)                 | 1.5 (0.9-2.6) | 1.6 (0.9-2.6) | 1.5 (0.9-2.6) | 0.369  | 1.6 (0.9-2.8) | 1.5 (0.9-2.4) | 0.100  |
| Lipid-modifying medication (%)               | 68.7          | 65.0          | 73.7          | 0.001  | 73.9          | 73.6          | >0.999 |
| Aspirin therapy (%)                          | 37.5          | 31.6          | 45.7          | <0.001 | 44.0          | 46.8          | 0.505  |
| NTpro-BNP (pg/mL)                            | 79 (18-344)   | 55 (14-212)   | 130 (29-576)  | <0.001 | 86 (21-344)   | 171 (38-764)  | <0.001 |
| hsCRP (mg/L)                                 | 2.5 (0.8-7.7) | 2.4 (0.8-7.2) | 2.7 (0.8-8.4) | 0.083  | 2.8 (0.9-8.4) | 2.6 (0.8-8.4) | 0.404  |
| Atrial fibrillation (% on ECG coding)        | 4.5           | 3.1           | 6.4           | 0.004  | 2.5           | 9.0           | 0.002  |
| Left ventricular hypertrophy (%)             | 2.0           | 1.5           | 2.7           | 0.122  | 2.5           | 2.8           | >0.999 |
| Cerebrovascular disease (%)                  | 8.5           | 5.7           | 12.3          | <0.001 | 9.9           | 13.9          | 0.165  |
| Coronary heart disease (%)                   | 28.7          | 19.2          | 41.8          | <0.001 | 39.3          | 43.5          | 0.313  |
| History of heart failure (%)                 | 6.3           | 2.7           | 11.3          | <0.001 | 6.6           | 14.4          | 0.004  |
| Peripheral arterial disease (%)              | 22.5          | 21.0          | 24.5          | 0.139  | 20.7          | 26.9          | 0.100  |
| Peripheral sensory neuropathy (%)            | 58.2          | 55.1          | 62.6          | 0.005  | 58.1          | 65.6          | 0.071  |
| eGFR category (%)                            |               |               |               | <0.001 |               |               | 0.001  |
| ≥90 mL/min/1.73m <sup>2</sup>                | 38.7          | 45.6          | 29.1          |        | 36.1          | 24.4          |        |
| 60-89 mL/min/1.73m <sup>2</sup>              | 44.9          | 42.0          | 48.9          |        | 47.7          | 49.7          |        |
| 45-59 mL/min/1.73m <sup>2</sup>              | 8.8           | 7.5           | 10.5          |        | 10.0          | 10.8          |        |
| 30-44 mL/min/1.73m <sup>2</sup>              | 4.8           | 3.6           | 6.5           |        | 2.5           | 9.2           |        |
| <30 mL/min/1.73m <sup>2</sup>                | 2.8           | 1.2           | 5.0           |        | 3.7           | 5.8           |        |

|                                              |                |               |                |        |                |                |        |
|----------------------------------------------|----------------|---------------|----------------|--------|----------------|----------------|--------|
| Urinary albumin:creatinine ratio (mg/mmol)   | 3.3 (0.8-12.6) | 2.7 (0.8-9.2) | 4.1 (0.9-18.6) | <0.001 | 3.8 (0.8-17.9) | 4.4 (1.0-19.0) | 0.237  |
| History of ESKD (%)                          | 0.8            | 0.2           | 1.7            | 0.006  | 0.4            | 2.5            | 0.056  |
| Any diabetic retinopathy (%)                 | 36.4           | 34.5          | 38.9           | 0.092  | 38.1           | 39.5           | 0.797  |
| History of COPD (%)                          | 2.5            | 1.1           | 4.5            | <0.001 | 4.5            | 4.4            | >0.999 |
| Charlson Comorbidity Index <sup>a</sup> (%): |                |               |                | <0.001 |                |                | 0.022  |
| 0                                            | 75.5           | 82.3          | 65.8           |        | 70.7           | 62.6           |        |
| 1 or 2                                       | 16.7           | 13.5          | 21.1           |        | 20.7           | 21.3           |        |
| ≥3                                           | 7.9            | 4.1           | 13.1           |        | 8.7            | 16.1           |        |
| History of valve disease (%)                 | 2.4            | 1.3           | 4.0            | 0.002  | 1.7            | 5.5            | 0.018  |
| History of sleep apnoea (%)                  | 4.1            | 3.1           | 5.3            | 0.043  | 6.6            | 4.4            | 0.269  |

<sup>a</sup>In the past 5 years and excluding diabetes and diabetes-specific complications

**Table S2.** Independent associates of i) capture by NEDA database, and ii) RVSP measured in FDS2 participants with confirmed type 2 diabetes.

|                                                | NEDA no/yes       |         | RVSP measured     |         |
|------------------------------------------------|-------------------|---------|-------------------|---------|
|                                                | OR (95% CI)       | P-value | OR (95% CI)       | P-value |
| Age (increase of 1 year)                       |                   |         | 1.04 (1.02, 1.06) | <0.001  |
| Male                                           |                   |         | 0.49 (0.34, 0.71) | <0.001  |
| Other European                                 |                   |         | 0.41 (0.21, 0.80) | 0.009   |
| Mixed/other ethnic background                  | 0.65 (0.47, 0.90) | 0.010   |                   |         |
| Married/ <i>de facto</i>                       | 0.76 (0.60, 0.96) | 0.021   |                   |         |
| BMI (increase of 1 kg/m <sup>2</sup> )         | 1.04 (1.02, 1.06) | <0.001  | 0.95 (0.92, 0.98) | 0.001   |
| Age at diabetes diagnosis (increase of 1 year) | 0.98 (0.97, 0.99) | <0.001  |                   |         |
| Using insulin                                  |                   |         | 0.50 (0.33, 0.75) | 0.001   |
| On aspirin                                     | 1.40 (1.10, 1.79) | 0.007   |                   |         |
| eGFR ≥ 90 mL/min/1.73m <sup>2</sup>            | 0.64 (0.49, 0.83) | 0.001   |                   |         |
| eGFR = 30-44 mL/min/1.73m <sup>2</sup>         |                   |         | 2.95 (1.13, 7.71) | 0.027   |
| Ln(NT-proBNP (pg/mL)) <sup>a</sup>             | 1.40 (1.27, 1.55) | <0.001  |                   |         |
| Atrial fibrillation                            |                   |         | 3.13 (1.22, 8.01) | 0.018   |
| Coronary heart disease                         | 2.03 (1.55, 2.66) | <0.001  |                   |         |
| History of heart failure                       |                   |         | 2.41 (1.26, 4.58) | 0.008   |
| Charlson Comorbidity Index ≥ 3                 | 1.89 (1.17, 3.06) | <0.001  |                   |         |

<sup>a</sup>A 2.72-fold increase in x corresponds to an increase of 1 in ln(x)

**Table S3.** Echocardiographic parameters for participants with a matched echocardiographic study by prevalent and incident PH at time PH was first identified by echocardiography. Data are presented as number (n), percentages (%), mean±SD or median [inter-quartile range]. The number of measurements (n) per variable is presented when it differs from the total number. LVDD = left ventricular diastolic dimension, LV= left ventricular, LVEF= left ventricular ejection fraction, LA= left atrial, eRVSP= estimated right ventricular systolic pressure and TR= tricuspid regurgitation. Aortic stenosis (>mild) was defined as aortic valve mean gradient > 20 mmHg, Mitral stenosis (>mild) was defined as mitral valve mean gradient > 5 mmHg. Left heart disease (any manifestation) represents the presence of any one or more of the following: LVEF <55%, > mild mitral stenosis or regurgitation, > mild aortic stenosis or regurgitation, LA volume index> 34 ml/m<sup>2</sup> or E:e' ratio >15.

|                                                      | Prevalent PH               |                            | Incident PH                |                            |
|------------------------------------------------------|----------------------------|----------------------------|----------------------------|----------------------------|
|                                                      | RVSP >30 mmHg              | RVSP >40 mmHg              | RVSP >30 mmHg              | RVSP >40 mmHg              |
| Number                                               | 90                         | 35                         | 123                        | 70                         |
| Age (years)                                          | 68.8±9.7                   | 70.7±8.4                   | 74.5±10.7                  | 75.5±10.6                  |
| Sex (% male)                                         | 52.2                       | 62.9                       | 39.0                       | 41.4                       |
| LVDD (cm)                                            | 4.8±0.6 (n=56)             | 4.7±0.6 (n=17)             | 4.8±0.7 (n=81)             | 4.8±0.8 (n=43)             |
| LV mass index (g/m <sup>2</sup> )                    | 103 [83-123] (n=48)        | 112 [82-130] (n=15)        | 96 [83-119] (n=56)         | 109 [90-125] (n=28)        |
| LVEF (%)                                             | 64 [59-70] (n=57)          | 64 [60-72] (n=19)          | 60 [50-66] (n=103)         | 58 [38-63] (n=59)          |
| Mitral inflow E velocity (cm/s)                      | 91±27 (n=71)               | 102±31 (n=27)              | 104±32 (n=100)             | 118±34 (n=48)              |
| Mitral inflow E:A ratio                              | 0.89 [0.76-1.19]<br>(n=64) | 0.90 [0.73-1.33]<br>(n=21) | 1.04 [0.79-1.47]<br>(n=88) | 1.20 [0.88-1.84]<br>(n=41) |
| Septal E:e' ratio                                    | 10 [8-12] (n=34)           | 13 [10-16] (n=10)          | 14 [10-20] (n=69)          | 21 [14-23] (n=32)          |
| LA volume index (ml/m <sup>2</sup> )                 | 35 [26-43] (n=48)          | 35 [27-48] (n=15)          | 36 [25-47] (n=53)          | 47 [36-57] (n=27)          |
| Non-sinus rhythm (% , including atrial fibrillation) | 31.1                       | 42.9                       | 26.8                       | 40.0                       |
| eRVSP (mmHg)                                         | 34 [36-41]                 | 43 [41-49]                 | 39 [34-46]                 | 47 [43-53]                 |
| TR peak velocity (cm/s)                              | 280 [270-300]              | 304 [300-328]              | 290 [268-320]              | 323 [310-348]              |
| Left heart disease (any manifestation, %)            | 22.2                       | 20.0                       | 56.1                       | 60.0                       |
